# Supplementary material for: Cross-Cultural Validation of Urdu Version KOOS in Indian Population with Primary Knee Osteoarthritis
Source: Hindawi journal article supplement (doi:10.1155/2017/1206706), 2017-01-01
Supplement: f1 [file 1206706.f1.pdf]

**Supplement I: Inter-item analysis for KOOS (Urdu) subscales in Knee OA patients**

Pain inter-item correlation [Cronbach's Alpha 0.880 (95% CI 0.845-0.910)]

| SNo | Item | 0.1-2.0 | 2.1-2.89 | 2.9-7.0 | 7.1-8.0 | 8.1-9.0 |
|-----|------|---------|----------|---------|---------|---------|
| 1   | P1   | 01      | 03       | 04      |         |         |
| 2   | P2   |         |          | 08      |         |         |
| 3   | P3   |         | 01       | 07      |         |         |
| 4   | P4   |         |          | 08      |         |         |
| 5   | P5   |         |          | 08      |         |         |
| 6   | P6   |         |          | 08      |         |         |
| 7   | P7   | 01      |          | 07      |         |         |
| 8   | P8   |         | 01       | 07      |         |         |
| 9   | P9   |         | 01       | 07      |         |         |
|     |      | 02      | 06       | 64      |         |         |

P1-P3 0.283

P1-P7 0.001

P1-P8 0.217

P1-P8 0.242

Symptom inter-item correlation [Cronbach's Alpha 0.789 (95% CI 0.725-0.843)]

| SNo | Item | 0.1-2.0 | 2.1-2.89 | 2.9-7.0 | 7.1-8.0 | 8.1-9.0 |
|-----|------|---------|----------|---------|---------|---------|
| 1   | S1   | 01      |          | 05      |         |         |
| 2   | S2   | 02      | 01       | 03      |         |         |
| 3   | S3   |         | 01       | 05      |         |         |
| 4   | S4   |         | 03       | 03      |         |         |
| 5   | S5   | 01      | 02       | 03      |         |         |
| 6   | S6   |         | 01       | 05      |         |         |
| 7   | S7   | 02      | 02       | 02      |         |         |
|     |      | 06      | 10       | 26      |         |         |

|       |       |       |       |
|-------|-------|-------|-------|
| S1-S7 | 0.131 | S2-S4 | 0.262 |
| S2-S5 | 0.180 | S2-S7 | 0.163 |
| S3-S5 | 0.276 | S4-S6 | 0.262 |
| S4-S7 | 0.233 | S5-S7 | 0.277 |

ADL inter-item correlation [Cronbach's Alpha 0.914 (95% CI 0.889-0.935)]

| SNo | Item  | 1.1-2.0 | 2.1-2.89 | 2.9-7.0 | 7.1-8.0 | 8.1-9.0 |
|-----|-------|---------|----------|---------|---------|---------|
| 1   | ADL1  |         | 01`      | 15      |         |         |
| 2   | ADL2  | 02      | 04       | 10      |         |         |
| 3   | ADL3  | 02      | 06       | 08      |         |         |
| 4   | ADL4  | 01      |          | 15      |         |         |
| 5   | ADL5  |         | 02       | 14      |         |         |
| 6   | ADL6  | 01      |          | 15      |         |         |
| 7   | ADL7  |         |          | 16      |         |         |
| 8   | ADL8  |         | 02       | 14      |         |         |
| 9   | ADL9  | 01      | 04       | 11      |         |         |
| 10  | ADL10 |         | 03       | 13      |         |         |
| 11  | ADL11 |         | 04       | 12      |         |         |
| 12  | ADL12 | 01      | 01       | 14      |         |         |
| 13  | ADL13 |         |          | 16      |         |         |
| 14  | ADL14 | 01      | 02       | 13      |         |         |
| 15  | ADL15 |         | 06       | 10      |         |         |
| 16  | ADL16 | 03      | 07       | 06      |         |         |
| 17  | ADL17 |         | 04       | 12      |         |         |
|     |       | 12      | 46       | 218     |         |         |

|             |       |             |       |
|-------------|-------|-------------|-------|
| ADL1-ADL16  | 0.250 | ADL2-ADL9   | 0.136 |
| ADL2-ADL11  | 0.249 | ADL2-ADL12  | 0.221 |
| ADL2-ADL14  | 0.284 | ADL2-ADL15  | 0.268 |
| ADL2-ADL16  | 0.197 | ADL3-ADL9   | 0.210 |
| ADL3-ADL10  | 0.238 | ADL3-ADL11  | 0.226 |
| ADL3-ADL12  | 0.194 | ADL3-ADL14  | 0.163 |
| ADL3-ADL15  | 0.282 | ADL3-ADL16  | 0.230 |
| ADL3-ADL17  | 0.238 | ADL4-ADL16  | 0.179 |
| ADL5-ADL15  | 0.260 | ADL5-ADL16  | 0.283 |
| ADL6-ADL16  | 0.169 | ADL8-ADL9   | 0.267 |
| ADL8-ADL17  | 0.252 | ADL9-ADL16  | 0.247 |
| ADL9-ADL17  | 0.262 | ADL10-ADL15 | 0.266 |
| ADL10-ADL16 | 0.276 | ADL11-ADL16 | 0.237 |
| ADL11-ADL17 | 0.230 | ADL14-ADL15 | 0.286 |
| ADL15-ADL16 | 0.239 |             |       |

Sports inter-item correlation [Cronbach's Alpha 0.756 (95% CI 0.679-0.819)]

| SNo | Item | 0.1-2.0 | 2.1-2.89 | 2.9-7.0 | 7.1-8.0 | 8.1-9.0 |
|-----|------|---------|----------|---------|---------|---------|
| 1   | SP1  |         | 01       | 03      |         |         |
| 2   | SP2  |         |          | 04      |         |         |
| 3   | SP3  |         | 01       | 03      |         |         |
| 4   | SP4  |         | 01       | 03      |         |         |
| 5   | SP5  |         | 01       | 03      |         |         |
|     |      |         | 04       | 16      |         |         |

SP1-SP5      0.248

SP3-SP4      0.254

QOL inter-item correlation [Cronbach's Alpha 0.725 (95% CI 0.634-0.798)]

| SNo | Item | 0.1-2.0 | 2.1-2.89 | 2.9-7.0 | 7.1-8.0 | 8.1-9.0 |
|-----|------|---------|----------|---------|---------|---------|
| 1   | QOL1 | 01      |          | 02      |         |         |
| 2   | QOL2 | 01      |          | 02      |         |         |
| 3   | QOL3 |         |          | 03      |         |         |
| 4   | QOL4 |         |          | 03      |         |         |
|     |      | 02      |          | 10      |         |         |

QOL1-QOL2     0.194
