# Supplementary material for: Cross-Cultural Validation of Urdu Version KOOS in Indian Population with Primary Knee Osteoarthritis
Source: Hindawi journal article supplement (doi:10.1155/2017/1206706), 2017-01-01
Supplement: f2 [file 1206706.f2.pdf]

**Supplement II: Agreement of responses between test (1<sup>st</sup>) and retest (2<sup>nd</sup>) administration of KOOS (Urdu) in Knee OA patients**

|          | SP 1  | SP 2  | SP 3  | SP 4  | SP 5  | Q 1   | Q 2   | Q 3   | Q 4   |
|----------|-------|-------|-------|-------|-------|-------|-------|-------|-------|
| 0/0      | -     | -     | -     | -     | -     | -     | 1     | -     | -     |
| 1/1      | 15    | 8     | 9     | 10    | 9     | 18    | 15    | 12    | 16    |
| 2/2      | 39    | 46    | 35    | 30    | 33    | 27    | 23    | 26    | 24    |
| 3/3      | 43    | 36    | 52    | 46    | 48    | 46    | 43    | 39    | 42    |
| 4/4      | 8     | 14    | 10    | 17    | 17    | 14    | 18    | 21    | 26    |
| 0/1      | 1     | -     | -     | -     | -     | 1     | 1     | -     | -     |
| 1/2      | 2     | 2     | 1     | 1     | -     | 2     | 1     | 2     | -     |
| 2/3      | 2     | 3     | 2     | 6     | 3     | 2     | 4     | 5     | 2     |
| 3/4      | 1     | 2     | 2     | 1     | 1     | 1     | 3     | 6     | 1     |
| 0/2      | -     | -     | -     | -     | -     | -     | -     | -     | -     |
| 1/3      | -     | -     | -     | -     | -     | -     | 1     | -     | -     |
| 2/4      | -     | -     | -     | -     | -     | -     | -     | -     | -     |
| 0/3      | -     | -     | -     | -     | -     | -     | -     | -     | -     |
| 1/4      | -     | -     | -     | -     | -     | -     | -     | -     | -     |
| 0/4      | -     | -     | -     | -     | -     | -     | 1     | -     | -     |
| AR (%)   | 94.59 | 93.69 | 95.50 | 92.79 | 96.40 | 94.59 | 90.09 | 88.29 | 97.30 |
| R1E (%)  | 5.41  | 6.31  | 4.50  | 7.21  | 3.60  | 5.41  | 8.11  | 11.71 | 2.70  |
| R>1E (%) | -     | -     | -     | -     | -     | -     | 1.80  | -     | -     |

SP denotes sports category; Q denotes quality of life category; AR-absolute response; R1E-response with 1 error; R>1E-response with greater than 1 error

|          | P 1   | P 2   | P 3   | P 4   | P 5   | P 6   | P 7   | P 8   | P 9   |
|----------|-------|-------|-------|-------|-------|-------|-------|-------|-------|
| 0/0      | 3     | 1     | 3     | 1     | 4     | 1     | 1     | -     | 1     |
| 1/1      | 21    | 24    | 19    | 24    | 28    | 18    | 21    | 25    | 21    |
| 2/2      | 39    | 43    | 44    | 42    | 32    | 40    | 46    | 42    | 39    |
| 3/3      | 37    | 32    | 30    | 32    | 33    | 41    | 33    | 32    | 38    |
| 4/4      | 5     | 7     | 7     | 6     | 11    | 5     | 8     | 9     | 10    |
| 0/1      | -     | -     | -     | -     | -     | -     | 1     | -     | -     |
| 1/2      | 3     | 3     | 1     | 4     | 2     | 2     | 1     | -     | 1     |
| 2/3      | -     | 1     | 5     | 2     | 1     | 3     | -     | 2     | -     |
| 3/4      | 1     | -     | 1     | -     | -     | -     | -     | -     | -     |
| 0/2      | -     | -     | -     | -     | -     | -     | -     | -     | -     |
| 1/3      | -     | -     | 1     | -     | -     | -     | -     | 1     | 1     |
| 2/4      | -     | -     | -     | -     | -     | -     | -     | -     | -     |
| 0/3      | -     | -     | -     | -     | -     | -     | -     | -     | -     |
| 1/4      | 2     | -     | -     | -     | -     | 1     | -     | -     | -     |
| 0/4      | -     | -     | -     | -     | -     | -     | -     | -     | -     |
| AR (%)   | 94.59 | 96.40 | 92.79 | 94.59 | 97.30 | 94.59 | 98.20 | 97.30 | 98.20 |
| R1E (%)  | 3.60  | 3.60  | 6.31  | 5.41  | 2.70  | 4.50  | 1.80  | 1.80  | 0.90  |
| R>1E (%) | 1.80  | -     | 0.90  | -     | -     | 0.90  | -     | 0.90  | 0.90  |

P denotes pain category; AR-absolute response; R1E-response with 1 error; R>1E-response with greater than 1 error

|          | S 1   | S 2   | S 3   | S 4   | S 5   | S 6   | S 7   |  |  |
|----------|-------|-------|-------|-------|-------|-------|-------|--|--|
| 0/0      | 5     | 5     | 3     | 5     | 2     | 2     | 1     |  |  |
| 1/1      | 32    | 32    | 35    | 32    | 27    | 35    | 32    |  |  |
| 2/2      | 61    | 33    | 43    | 39    | 40    | 32    | 40    |  |  |
| 3/3      | 11    | 28    | 17    | 28    | 24    | 35    | 32    |  |  |
| 4/4      | 1     | 2     | 4     | 3     | 9     | 2     | 4     |  |  |
| 0/1      | -     | 1     | 1     | -     | 1     | -     | -     |  |  |
| 1/2      | -     | 4     | 4     | -     | 3     | 2     | 1     |  |  |
| 2/3      | -     | 4     | 3     | 3     | 3     | 1     | -     |  |  |
| 3/4      | -     | -     | -     | -     | 1     | -     | -     |  |  |
| 0/2      | -     | -     | -     | 1     | 1     | -     | -     |  |  |
| 1/3      | -     | 1     | -     | -     | -     | 2     | 1     |  |  |
| 2/4      | -     | -     | -     | -     | -     | -     | -     |  |  |
| 0/3      | 1     | -     | -     | -     | -     | -     | -     |  |  |
| 1/4      | -     | 1     | 1     | -     | -     | -     | -     |  |  |
| 0/4      | -     | -     | -     | -     | -     | -     | -     |  |  |
| AR (%)   | 99.10 | 90.09 | 91.89 | 96.40 | 91.89 | 95.50 | 98.20 |  |  |
| R1E (%)  | -     | 8.11  | 7.21  | 2.70  | 7.21  | 2.70  | 0.90  |  |  |
| R>1E (%) | 0.90  | 1.80  | 0.90  | 0.90  | 0.90  | 1.80  | 0.90  |  |  |

S denotes symptoms category; AR-absolute response; R1E-response with 1 error; R>1E-response with greater than 1 error

|          | A 1   | A 2   | A 3   | A 4   | A 5   | A 6   | A 7   | A 8   | A 9   |
|----------|-------|-------|-------|-------|-------|-------|-------|-------|-------|
| 0/0      | 1     | 2     | 1     |       | 1     | 3     | 1     | 1     | 3     |
| 1/1      | 22    | 23    | 21    | 26    | 24    | 27    | 19    | 30    | 21    |
| 2/2      | 51    | 41    | 52    | 38    | 51    | 42    | 49    | 45    | 51    |
| 3/3      | 30    | 31    | 24    | 35    | 23    | 32    | 32    | 27    | 27    |
| 4/4      | 5     | 5     | 7     | 4     | 3     | 1     | 3     | 5     | 2     |
| 0/1      | -     | -     | 1     | 1     | 1     | -     | -     | -     | 1     |
| 1/2      | 1     | 2     | 1     | 2     | 5     | -     | 3     | 3     | 2     |
| 2/3      | 1     | 5     | 3     | 2     | 3     | 4     | 4     | -     | 4     |
| 3/4      | -     | -     | -     | 2     | -     | -     | -     | -     | -     |
| 0/2      | -     | -     | -     | -     | -     | 1     | -     | -     | -     |
| 1/3      | -     | 1     | -     | 1     | -     | 1     | -     | -     | -     |
| 2/4      | -     | 1     | -     | -     | -     | -     | -     | -     | -     |
| 0/3      | -     | -     | -     | -     | -     | -     | -     | -     | -     |
| 1/4      | -     | -     | 1     | -     | -     | -     | -     | -     | -     |
| 0/4      | -     | -     | -     | -     | -     | -     | -     | -     | -     |
| AR (%)   | 98.20 | 91.89 | 94.59 | 92.79 | 91.89 | 94.59 | 93.69 | 97.30 | 93.69 |
| R1E (%)  | 1.80  | 6.31  | 4.50  | 6.31  | 8.11  | 3.60  | 6.31  | 2.70  | 6.31  |
| R>1E (%) | -     | 1.80  | 0.90  | 0.90  | -     | 1.80  | -     | -     | -     |

A denotes ADL category; AR-absolute response; R1E-response with 1 error; R>1E-response with greater than 1 error

|          | A 10  | A 11  | A 12  | A 13  | A 14  | A 15  | A 16  | A 17  |  |
|----------|-------|-------|-------|-------|-------|-------|-------|-------|--|
| 0/0      | 1     | 3     | 2     | 2     | 1     | -     | -     | 1     |  |
| 1/1      | 31    | 23    | 26    | 22    | 28    | 25    | 26    | 23    |  |
| 2/2      | 40    | 52    | 50    | 45    | 45    | 50    | 48    | 51    |  |
| 3/3      | 31    | 30    | 29    | 38    | 27    | 28    | 30    | 32    |  |
| 4/4      | 4     | 1     | -     | 1     | 6     | 2     | 3     | 3     |  |
| 0/1      | 2     | 1     | -     | -     | -     | -     | -     | -     |  |
| 1/2      | 2     | 1     | 2     | 2     | 1     | -     | 1     | -     |  |
| 2/3      | -     | -     | 2     | 1     | 2     | 3     | 3     | 1     |  |
| 3/4      | -     | -     | -     | -     | -     | 1     | -     | -     |  |
| 0/2      | -     | -     | -     | -     | 1     | -     | -     | -     |  |
| 1/3      | -     | -     | -     | -     | -     | 1     | -     | -     |  |
| 2/4      | -     | -     | -     | -     | -     | 1     | -     | -     |  |
| 0/3      | -     | -     | -     | -     | -     | -     | -     | -     |  |
| 1/4      | -     | -     | -     | -     | -     | -     | -     | -     |  |
| 0/4      | -     | -     | -     | -     | -     | -     | -     | -     |  |
| AR (%)   | 96.40 | 98.20 | 96.40 | 97.30 | 96.40 | 94.59 | 96.40 | 99.10 |  |
| R1E (%)  | 3.60  | 1.80  | 3.60  | 2.70  | 2.70  | 3.60  | 3.60  | 0.90  |  |
| R>1E (%) | -     | -     | -     | -     | 0.90  | 1.80  | -     | -     |  |

A denotes ADL category; AR-absolute response; R1E-response with 1 error; R>1E-response with greater than 1 error
